# Supplementary material
Source: publisher figshare collection journal article supplement (https://rs.figshare.com/ndownloader/files/15191420)
Supplement: Supplementary file 1 [file 15191420]

Archive with 1 entries (1 files):
- 15191420.out
